# Supplementary material for: From cellulose to 1,2,4-benzenetriol via catalytic degradation over a wood-based activated carbon catalyst
Source: Royal Society of Chemistry journal article supplement (doi:10.1039/d0cy00424c), 2020-01-01
Supplement: d0cy00424c1.pdf [file d0cy00424c1.pdf]

# From Cellulose to 1,2,4-Benzenetriol via Catalytic Degradation over Wood-based Activated Carbon Catalyst

**Qiong Wu <sup>a,b</sup>, Baozheng Zhao <sup>a</sup>, Shiwei Liu <sup>a</sup>, Shitao Yu <sup>a</sup>, Lang Huang <sup>a,b\*</sup> and Arthur J.  
Ragauskas <sup>c</sup>**

*<sup>a</sup>State key laboratory base of eco-chemical Engineering, College of Chemical Engineering,  
Qingdao University of Science and Technology, 53 Zhengzhou Road, Qingdao, Shandong  
province, 266042, PR China*

*<sup>b</sup>Qingdao Institute of Bioenergy and Bioprocess Technology, Chinese Academy of Sciences,  
Qingdao, Shandong province, 26101, China*

*<sup>c</sup>Joint Institute of Biological Science, Biosciences Division, Oak Ridge National Laboratory,  
Oak Ridge, TN, USA, 37830*

*\*Corresponding author: Tel: +86 53284022719 E-mail: [huanglang@qibebt.ac.cn](mailto:huanglang@qibebt.ac.cn) (L Huang)*

**Table S1** Textural properties derived from the N<sub>2</sub> adsorption-desorption isotherms.

| Samples          | S <sub>BET</sub><br>(m <sup>2</sup> /g) | S <sub>meso</sub><br>(m <sup>2</sup> /g) | S <sub>micro</sub><br>(m <sup>2</sup> /g) | Pore Volume<br>(cm <sup>3</sup> /g) | Average pore<br>diameter (nm) |
|------------------|-----------------------------------------|------------------------------------------|-------------------------------------------|-------------------------------------|-------------------------------|
| CSP <sub>1</sub> | 1115 ± 123                              | 152 ± 9                                  | 963 ± 96                                  | 0.65 ± 0.1                          | 2.34 ± 0.2                    |
| CSP <sub>4</sub> | 269 ± 22                                | 175 ± 12                                 | 94 ± 18                                   | 0.17 ± 0.1                          | 4.01 ± 0.3                    |

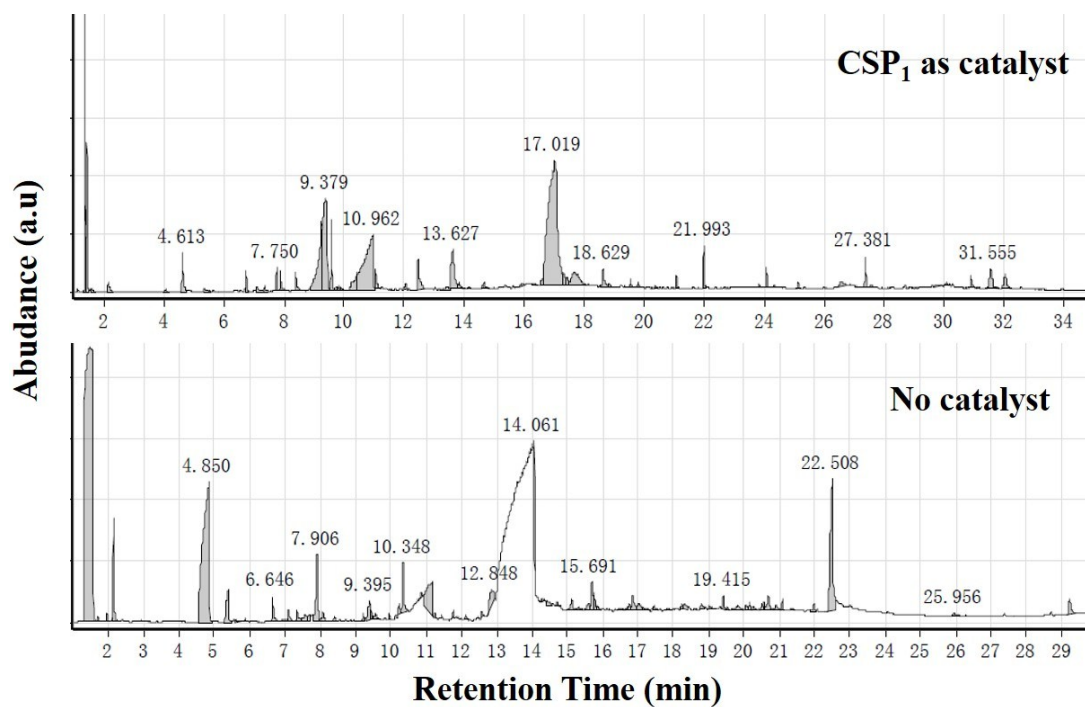

**Fig.S1** GC chromatographs of products distribution with and without catalysts:

Cellulose (0.2 g), catalyst (0.4 g), N<sub>2</sub> (1 MPa), 210 °C, 1 h.

**Table S2** The typical compounds from cellulose in this study with and without catalysts.

| Retention time<br>(S) | Compound                                                        | Selectivity % |                  |
|-----------------------|-----------------------------------------------------------------|---------------|------------------|
|                       |                                                                 | No catalyst   | CSP <sub>1</sub> |
| 2.141                 | Propanoic acid, ethyl ester                                     | 1.47          | 0.46             |
| 4.039                 | 2-Butenoic acid, 2-methyl, methyl ester                         | --            | 0.12             |
| 4.613                 | 3-Furaldehyde                                                   | 14.60         | 1.71             |
| 5.322                 | 2-Butanone                                                      | 1.31          | 0.16             |
| 6.646                 | Ethanone, 1-(2-furanyl)-                                        | 0.54          | --               |
| 6.728                 | 1,3-Diocepane, 2-methyl-2-propyl-                               | --            | 0.56             |
| 7.091                 | 2-Pentenoic acid, 4-hydroxy-                                    | --            | 0.22             |
| 7.195                 | 2,5-Hexanedione                                                 | 0.31          | --               |
| 7.359                 | 2,4-Dimethyl-3-pentanol acetate                                 | --            | 0.16             |
| 7.693                 | trans-2-Pentenoic acid                                          | 0.61          | --               |
| 7.863                 | 2-Furancarboxaldehyde, 5-methyl-                                | 2.01          | 0.81             |
| 8.376                 | Phenol                                                          | 0.12          | 0.86             |
| 9.238                 | Hexanoic acid                                                   | --            | 7.20             |
| 9.379                 | 2-Cyclopenten-1-one, 2-hydroxy-3-methyl-                        | 0.67          | 11.46            |
| 9.577                 | Hexanal dimethyl acetal                                         | --            | 2.14             |
| 9.751                 | 2(3H)-Furanone, 5-butyldihydro-                                 | --            | 0.13             |
| 9.822                 | 2,5,5-Trimethyl-3-hexyn-2-ol                                    | --            | 0.16             |
| 9.879                 | 2-Cyclopenten-1-one, 3-ethyl-2-hydroxy-                         | 0.08          | 0.19             |
| 9.947                 | 4H-Pyran-4-one, 2-ethyl-6-methyl-                               | 0.09          | --               |
| 10.962                | 4-Oxopentanoic acid                                             | 3.23          | 15.64            |
| 11.042                | 2,5-Cyclohexadiene-1,4-dione,2-hydroxy-5-methyl-                | --            | 0.84             |
| 11.765                | 2,3-Dihydroxybenzaldehyde                                       | 0.14          | --               |
| 12.459                | Catechol                                                        | 0.10          | 1.77             |
| 13.392                | 1-Methoxy-3,5-dimethylcyclohexene                               | --            | 0.23             |
| 13.627                | Hydroquinone                                                    | --            | 4.22             |
| 14.061                | 5-Hydroxymethylfurfural                                         | 58.12         | 1.85             |
| 14.169                | Bicyclo [3.1.0] hexane-6-methanol, 2-hydroxy-1,4,4-trimethyl-   | --            | 0.11             |
| 15.691                | 1,2-Benzenediol                                                 | 0.83          | --               |
| 15.754                | Benzenemethanol, alpha-ethyl-4-methoxy-                         | 0.48          | --               |
| 15.945                | 5-tert-Butylpyrogallol                                          | --            | 0.33             |
| 16.604                | 2,4,6-Trimethoxytoluene                                         | --            | 0.33             |
| 16.842                | 3-Buten-2-one, 3-methyl-4-(1,3,3-trimethyl-7-oxabicyclo heptan) | 0.63          | --               |
| 17.019                | 1,2,4-Benzenetriol                                              | 0.21          | 36.97            |
| 17.123                | 3-buten-2-one, 4-(5,5- dimethyl-1-oxaspiro [2.5] oct-4-yl)      | 0.09          | --               |
| 17.654                | 3,4,5-Trihydroxytoluene                                         | --            | 2.88             |

|        |                                                                  |      |      |
|--------|------------------------------------------------------------------|------|------|
| 18.818 | 2,5-Heptadienoic anhydride,2,3,4,5,6-pentamethyl-                | --   | 0.16 |
| 19.415 | 5,6,6-Trimethyl-5-(3-oxobut-1-enyl)-1-oxaspiro [2.5] octan-4-one | 0.55 | --   |
| 19.548 | 11-Oxatetracyclo [5.3.2.0(2,7).0(2,8)] dodecan-9-one             | --   | 0.24 |
| 20.363 | 2,2,6,7-Tetramethyl-10-oxatricyclo [4.3.1.0(1,6)] decan-5-ol     | --   | 0.11 |
| 21.079 | 1,2-Benzenedicarboxylic acid, bis(2-methylpropyl) ester          | --   | 0.29 |
| 21.993 | n-Hexadecanoic acid                                              | --   | 1.15 |
| 22.508 | 5,6,6-Trimethyl-5-(3-oxobut-1-enyl)-1-oxaspiro-4-one             | 6.21 | --   |
| 24.079 | Octadecanoic acid                                                | --   | 0.58 |
| 25.139 | 2-Benzofurancarboxylic acid                                      | --   | 0.20 |
| 27.381 | Phenol, 2,2'-methylenebis[6-(1,1-dimethylethyl)-4-methyl-        | --   | 0.85 |
| 29.227 | Zearalenone                                                      | 0.68 | --   |

---

Reaction conditions: Cellulose (0.2 g), catalyst (0.4 g), N<sub>2</sub> (1MPa), 210 °C, 1 h.

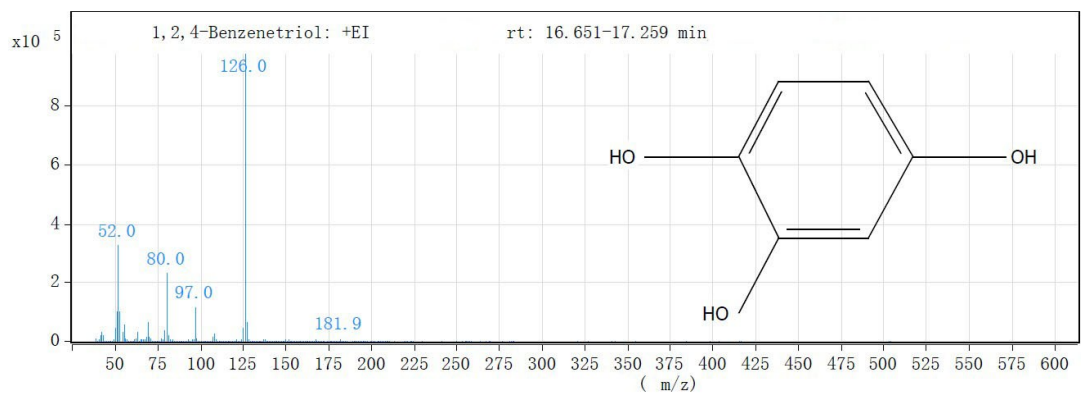

**Fig.S2** MS spectrogram of 1,2,4-Benzenetriol. Reaction conditions: Cellulose (0.2 g), CSP<sub>1</sub> as catalyst (0.4 g), N<sub>2</sub> (1MPa), 210 °C, 1h.

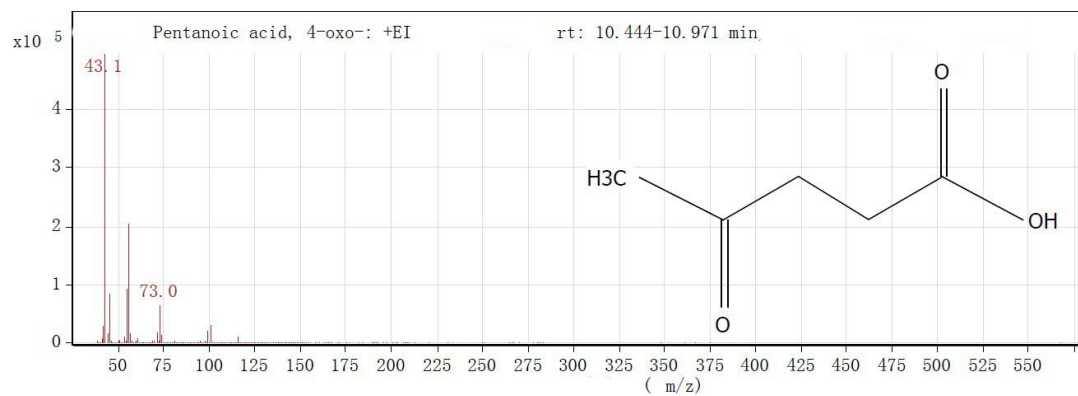

**Fig.S3** MS spectrogram of Pentanoic acid, 4-oxo. Reaction conditions: Cellulose (0.2 g), CSP<sub>1</sub> as catalyst (0.4 g), N<sub>2</sub> (1MPa), 210 °C, 1h.

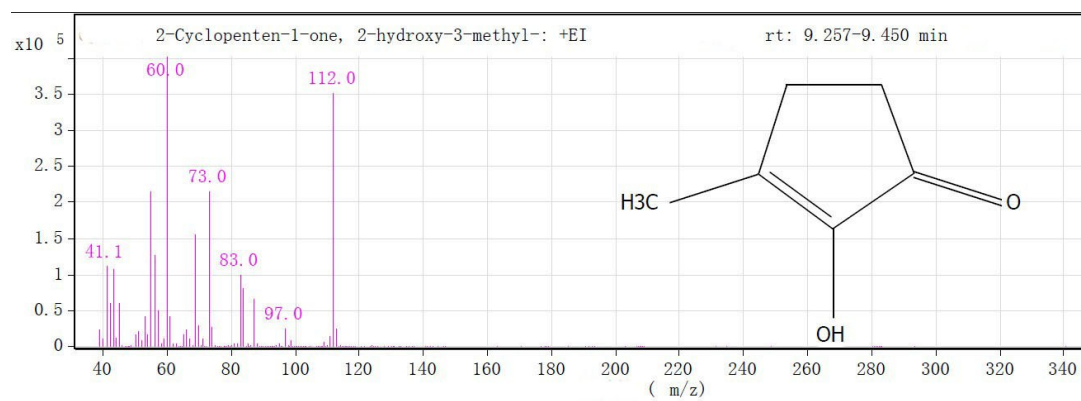

**Fig.S4** MS spectrogram of 2-Cyclopenten-1-one, 2-hydroxy-3-methyl-. Reaction conditions: Cellulose (0.2 g), CSP<sub>1</sub> as catalyst (0.4 g), N<sub>2</sub> (1MPa), 210 °C, 1h.



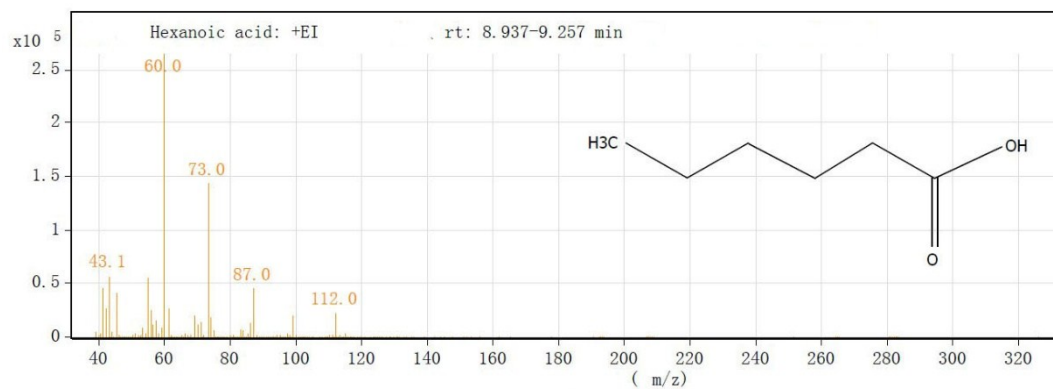

**Fig.S5** MS spectrogram of Hexanoic. Reaction conditions: Cellulose (0.2 g), CSP<sub>1</sub> as catalyst (0.4 g), N<sub>2</sub> (1MPa), 210 °C, 1h.

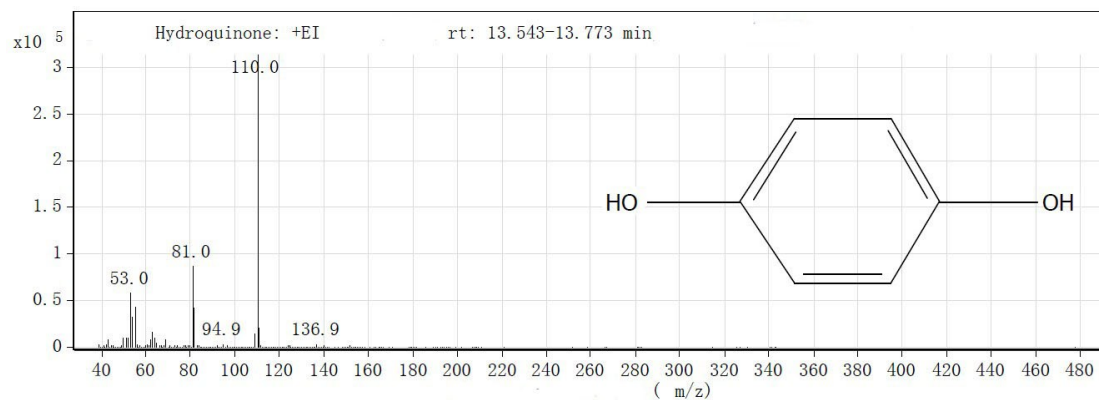

**Fig.S6** MS spectrogram of Hydroquinone. Reaction conditions: Cellulose (0.2 g), CSP<sub>1</sub> as catalyst (0.4 g), N<sub>2</sub> (1MPa), 210 °C, 1h.

**Table S3** The conversion of cellulose, selectivity and yield of products.

| Catalysts          | Catalyst Amount (g) | Time (h) | Temperature (°C) | Pressure (MPa) | Conversion (%) | Selectivity % | Yield % |
|--------------------|---------------------|----------|------------------|----------------|----------------|---------------|---------|
| CSP <sub>0.5</sub> |                     |          |                  |                | 98.5           | 18.73         | 18.45   |
| CSP <sub>1</sub>   |                     |          |                  |                | >99.9          | 36.97         | 36.93   |
| CSP <sub>2</sub>   | 0.4                 | 1        | 210              | 1              | >99.9          | 30.27         | 30.24   |
| CSP <sub>4</sub>   |                     |          |                  |                | >99.9          | 26.71         | 26.68   |
| CSP <sub>6</sub>   |                     |          |                  |                | >99.9          | 21.50         | 21.46   |
|                    | 0                   |          |                  |                | 43.6           | 0.21          | 0.09    |
|                    | 0.1                 |          |                  |                | 93.8           | 10.63         | 9.97    |
| CSP <sub>1</sub>   | 0.2                 | 1        | 210              | 1              | >99.9          | 22.63         | 22.60   |
|                    | 0.3                 |          |                  |                | >99.9          | 28.65         | 28.62   |
|                    | 0.5                 |          |                  |                | >99.9          | 21.41         | 21.38   |
|                    | 0.6                 |          |                  |                | >99.9          | 11.62         | 11.60   |
|                    |                     | 0.5      |                  |                | 96.4           | 28.66         | 27.62   |
|                    |                     | 1.5      |                  |                | >99.9          | 27.64         | 27.61   |
| CSP <sub>1</sub>   | 0.4                 | 2.0      | 210              | 1              | >99.9          | 25.92         | 25.89   |
|                    |                     | 2.5      |                  |                | >99.9          | 17.45         | 17.43   |
|                    |                     | 3.0      |                  |                | >99.9          | 11.76         | 11.74   |
|                    |                     |          | 190              |                | 86.3           | 8.46          | 7.30    |
| CSP <sub>1</sub>   | 0.4                 | 1        | 230              | 1              | >99.9          | 42.30         | 42.25   |
|                    |                     |          | 250              |                | >99.9          | 35.17         | 35.13   |
|                    |                     |          | 270              |                | 96.6           | 23.18         | 22.39   |
|                    |                     |          |                  | 0              | 35.7           | 3.25          | 1.16    |
| CSP <sub>1</sub>   | 0.4                 | 1        | 210              | 2.0            | >99.9          | 23.51         | 23.47   |
|                    |                     |          |                  | 3.0            | >99.9          | 13.33         | 13.31   |

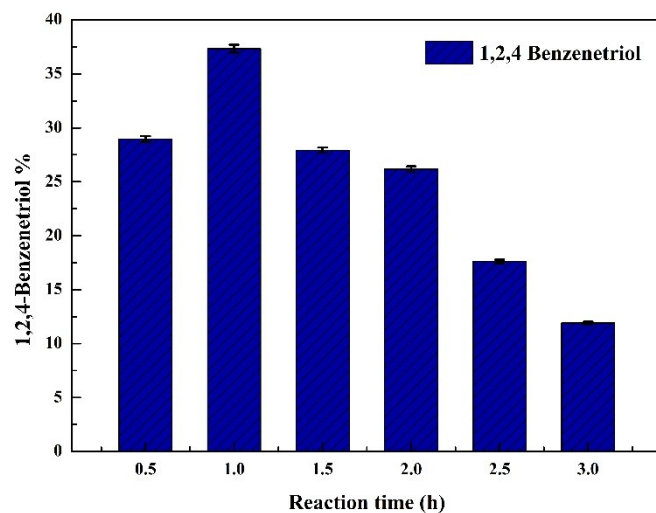

**Fig.S7** Effect of reaction time on 1,2,4- Benzenetriol production. Reaction conditions: Cellulose (0.2 g), CSP<sub>1</sub> as catalyst (0.4 g), N<sub>2</sub> (1MPa), 210 °C.

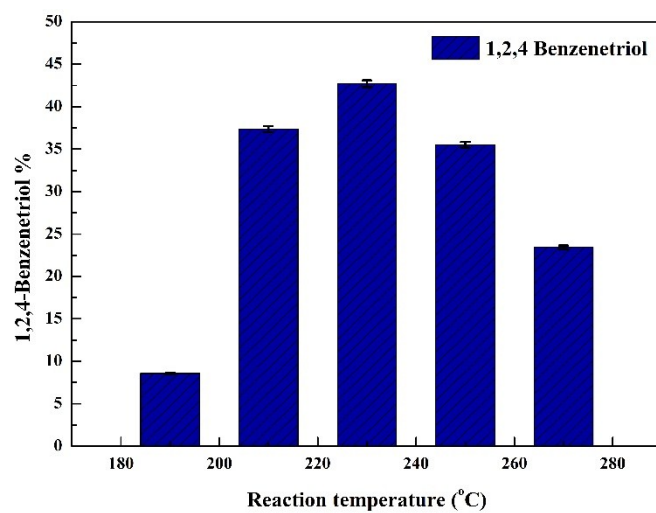

**Fig.S8** Effect of reaction temperature on 1,2,4- Benzenetriol production. Reaction conditions: Cellulose (0.2 g), CSP<sub>1</sub> as catalyst (0.4 g), N<sub>2</sub> (1MPa), 1 h.

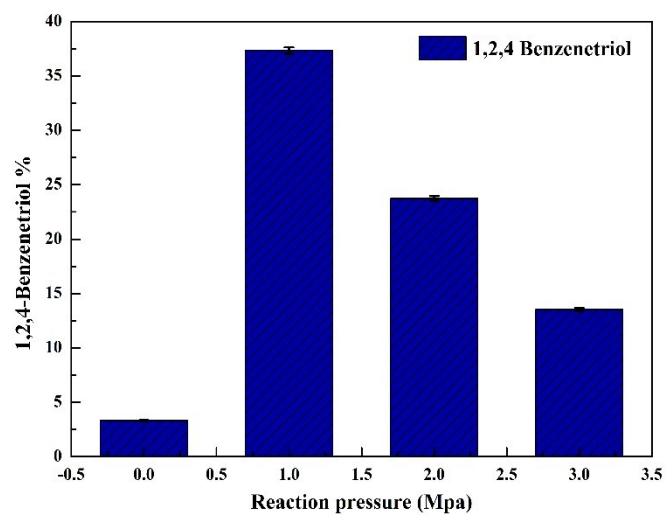

**Fig.S9** Effect of reaction pressure on 1,2,4- Benzenetriol production: Cellulose (0.2 g), CSP<sub>1</sub> as catalyst (0.4 g), 1 h, 210 °C.
